# Supplementary material for: Comparison of routine hematological indicators of liver and kidney function, blood count and lipid profile in healthy people and stroke patients
Source: PeerJ. 2020 Feb 7;8:e8545. doi: 10.7717/peerj.8545 (PMC7008814; doi:10.7717/peerj.8545)
Supplement: Health group information. [file peerj-08-8545-s001.xlsx]

## Sheet: Sheet1
Sample Number	Lymphocyte (10^9/L)	Mean corpuscular hemoglobin (pg)	Mean corpuscular hemoglobin concentration (g/L)	Red blood cell distribution width-DV (%)	Red blood Cell distribution width-SV (fl)	Platelet (10^9/L)	Mean platelet volume (fl)	Platelet large cell ratio (%)	Triglyceride (mmol/L)	High density lipoprotein cholesterol (mmol/L)	Albumin (g/L)	Globulin (g/L)	Albumin/Globulin (ratio)	Indirect bilirubin (umol/L)	Total bilirubin (umol/L)	Uric acid (umol/L)	Direct bilirubin (umol/L)	Total protein (g/L)	Blood urea nitrogen (mmol/L)
1011	1.1	32.2	339	11.5	47.3	155	9.9	12.6	2.02	1.11	49.8	20.2	2.47	12.2	18.2	396.8	6.8	70	5.74
1012	2.7	29.9	333	11.5	45	261	10.3	12.5	1.95	0.95	48.4	23.5	2.06	7.8	11.2	504.5	3.4	71.9	5.1
1013	2.1	32.9	329	9.7	46.2	224	11.1	16.5	0.68	1.47	51.5	23.8	2.16	20.3	29.2	434.8	8.9	75.3	4.06
1014	1.9	23.5	331	13.3	43.8	164	12.6	25.5	0.32	1.44	50	24.4	2.05	10.9	14.3	289.3	3.4	74.4	5.76
1015	2.2	31.5	343	10.6	48.5	224	10.3	12	0.72	1.34	46.2	26.7	1.73	10.2	16.3	275.9	6.1	72.9	3.69
1016	1.6	32.6	343	10.9	47.3	179	10.9	14.3	0.7	1.73	51.9	21.8	2.38	12.2	18.6	491	6.4	73.7	5.08
1017	3.1	30.7	334	11.3	46.2	271	9.6	9.5	2.96	0.92	52	26.4	1.97	9.1	12.6	443.5	3.5	78.4	4.62
1018	2.6	21	321	15.1	45	322	9.4	9.9	0.63	1.23	47.7	26.8	1.78	6.3	9.5	208.7	3.2	74.5	2.97
1019	1.9	29.5	329	11.5	46.2	183	10.6	14.7	0.52	1.29	50.3	29.9	1.68	7.6	11.4	562.7	3.8	80.2	6.79
1020	1.5	30.8	327	10.3	48.5	173	12.7	25.3	0.53	1.65	47.6	23.7	2.01	5.4	7.5	209.3	2.1	71.3	3.83
1021	2.8	30.4	337	10.8	50.9	185	11	17.3	1.03	1.11	50	28.2	1.77	3.4	5.9	437.3	2.5	78.2	3.97
1022	2.7	30.2	333	11.4	49.7	209	10.8	14.4	0.66	1.42	48.5	26.6	1.82	9.9	14.8	330.1	4.9	75.1	4.83
1023	1.8	30.7	328	11.1	48.5	153	10.5	13	1.33	1.29	52.2	20.4	2.56	17.6	25.7	315.6	8.1	72.6	3.87
1024	2.3	30.8	336	11.3	49.7	158	11.1	16.6	0.86	1.68	46.3	23.1	2	21.7	31.9	310	10.2	69.4	4.64
1025	4.1	29.6	330	10.9	47.3	280	11.6	18.6	0.7	1.41	50	27.3	1.83	5.4	7.6	243.8	2.2	77.3	6.53
1026	1.5	32.1	336	10.8	47.3	227	10.4	13.3	0.84	1.11	51.2	20.5	2.5	9.8	14.3	287.7	4.5	71.7	4.96
1027	2	31.2	338	10.5	37.9	215	10.7	15.7	0.84	1.58	50.8	29.8	1.7	6.4	8.7	234.3	2.3	80.6	1.96
1028	3.2	30.5	331	11.2	48.5	172	11.4	18.3	1.34	1.31	47	21.5	2.19	10	14.1	343.4	4.1	68.5	3.5
1029	1.6	22	324	12.9	45	214	12.9	27.3	1.02	1.45	48.5	25.5	1.9	10.3	14.2	268.6	3.9	74	3.32
1030	2.4	31.8	334	11.5	49.7	200	9.7	9.9	0.63	1.87	49.1	20.4	2.41	17.5	26.4	288.4	8.9	69.5	3.51
1031	2.4	32.4	340	10.9	45	205	11.7	19.6	0.51	1	50.7	26.6	1.91	6.5	10.3	415.2	3.8	77.3	4.99
1032	2.5	31.9	337	10.9	48.5	299	9.5	9.8	1.01	1.23	48.4	24.2	2	6.4	9.7	381.8	3.3	72.6	5.25
1033	2.4	29.6	327	10.7	45	253	11.4	16.8	0.47	1.26	49	22.8	2.15	7.5	12.7	306.1	5.2	71.8	1.7
1034	1.7	27.3	330	10.3	35.5	171	11.1	17.3	0.85	1.09	49.3	20.8	2.37	9.5	14.5	353.3	5	70.1	3.48
1035	2	29.9	323	10.5	48.5	146	13.1	28.1	0.55	1.97	52.1	24.7	2.11	10.3	15.2	288	4.9	76.8	3.9
1036	1.7	30.4	331	11.9	45	196	11	15.7	0.61	1.73	45.2	27.3	1.66	6.1	9.7	245	3.6	72.5	3.16
1037	1.9	18.2	311	14.6	36.7	335	10.6	15	1.09	1.55	46.2	27.3	1.69	5.6	7.7	203	2.1	73.5	2.93
1038	2.8	31.4	327	10.8	46.2	239	10.7	14.6	2.27	0.78	48.3	57	0.85	6.9	10.1	537.4	3.2	105.3	4.82
1039	2.8	31.2	327	11.5	48.5	214	11	15.3	0.99	1.25	52.5	21.8	2.41	5.3	8.5	348.4	3.2	74.3	5.81
1040	2.1	31	329	11	47.3	140	10.6	14.1	0.44	1.43	53.7	22.5	2.39	8.2	12.6	435.4	4.4	76.2	4.05
1041	3.1	29.9	331	11.4	45	149	11.6	18.5	0.73	0.93	47.5	22.8	2.08	9.4	14.9	404.1	5.5	70.3	4.24
1042	1.9	28.7	329	9.8	40.2	179	10.4	13.1	0.53	1.33	50.8	21.8	2.33	7.2	11.3	192.9	4.1	72.6	3.08
1043	1.6	31.6	334	10.9	48.5	165	11	15.4	1.56	1.65	50.1	20.3	2.47	9.4	13.3	608.1	3.9	70.4	4.38
1044	2.5	30.9	335	10.6	37.9	187	12.9	25.6	1.16	1.32	48	23.8	2.02	8.2	12.3	320.7	4.1	71.8	3.94
1045	3.7	33.3	331	10.3	49.7	268	10.1	12.4	1.33	1.16	48.2	24.4	1.98	11	17.2	409.1	6.2	72.6	3.26
1046	2.8	29	325	10.9	46.2	222	10.1	11.9	1.43	1.06	46.8	23.7	1.97	9.8	13.4	244.2	3.6	70.5	3.57
1047	2.4	29.1	328	11.7	49.7	270	11.1	16.3	1.43	1.51	44.9	24	1.87	4.2	6.5	408.9	2.3	68.9	4.73
1048	1.7	27.9	326	10.7	42.6	146	12.9	26.7	0.85	1.38	50.3	21	2.4	12	18.4	374.7	6.4	71.3	4.71
1049	1.8	33.4	331	9	43.8	145	11.2	16.9	0.77	1.43	49.1	24.2	2.03	10	14.7	483.9	4.7	73.3	7.85
1050	2	30.2	328	11.9	48.5	195	10.3	13.6	0.41	1.21	50	21.2	2.36	11.8	20.3	405.1	8.5	71.2	3.83
1051	1.9	29.5	324	11.3	47.3	280	11.6	19.7	1.12	1.06	51.1	20.8	2.46	10.8	16.1	547.2	5.3	71.9	4.95
1052	1.4	29.4	330	11.6	40.2	156	12.9	25.6	1.04	1.6	53.2	23.5	2.26	12.2	18.2	369.7	6	76.7	5.04
1053	1.8	30.3	334	10.7	48.5	260	11.6	19.5	1.31	1.34	48.5	22.1	2.19	6.4	9.1	263.3	2.7	70.6	2.41
1054	1.5	30	328	11.3	48.5	189	10.5	14.8	0.46	1.1	50.3	21.3	2.36	5.8	10.2	362.4	4.4	71.6	3.04
1055	1.7	31	340	12	49.7	206	10.5	14.7	0.42	1.77	47.6	20.6	2.31	5.2	7.6	275.3	2.4	68.2	4.1
1056	1.6	31.7	328	10.7	46.2	125	13.5	31	1.01	1.19	49.5	20.6	2.4	11.1	17.5	433.8	6.4	70.1	4.91
1057	2.8	30.6	325	12.9	48.5	141	10.7	16.3	2.4	0.64	47.1	23.2	2.03	17.2	26.8	530.6	9.6	70.3	3.09
1058	4.4	27.7	326	10	42.6	415	10.5	12.8	1.93	0.84	47.2	30	1.57	4.8	6.7	327.7	1.9	77.2	2.26
1059	1.6	31.6	330	10.2	46.2	252	10.9	14.2	1.11	1.05	46.7	24	1.95	4.1	6.6	291.7	2.5	70.7	3.11
1060	2.9	31.3	330	10.9	47.3	291	10.1	10.1	0.56	1.14	46.4	21.6	2.15	3.4	5.3	550	1.9	68	2.85
1061	2.1	30.1	327	11.2	48.5	186	10.7	15.7	1.11	1.19	48.1	24.9	1.93	7.8	11.8	409.4	4	73	4.83
1062	3.2	30.1	327	11.2	48.5	281	10.7	15.4	1.79	0.96	47	21.2	2.22	4	6.3	477.2	2.3	68.2	3.24
1063	3.3	28.3	333	10	35.5	171	10.8	15	0.69	1.38	50.9	24.6	2.07	10.6	13.3	405.9	2.7	75.5	5.76
1064	1.7	32.7	342	11.5	48.5	203	12.2	21.2	1.01	1.01	49.6	24.1	2.06	8.8	13.6	437.4	4.8	73.7	6.07
1065	1.8	31.2	337	10.5	45	227	10.8	14.6	1.77	1	47.6	27.2	1.75	11.8	16.4	303.5	4.6	74.8	4.47
1066	2.5	30.1	323	11.1	48.5	199	12.7	24.6	0.77	1.58	48.1	23.6	2.04	9	12.6	342.6	3.6	71.7	3.65
1067	1.9	29	331	9.7	34.3	262	9.9	9.6	1.09	1.52	47.9	25.6	1.87	8.1	11.9	281.9	3.8	73.5	4.29
1068	1.2	28.7	329	11.2	40.2	193	9.5	9.8	0.49	1.3	50.8	29	1.75	13.6	18.6	464.1	5	79.8	5.44
1069	2.3	31.3	324	10.7	47.3	210	11.2	17	1.47	1.4	52.2	26.4	1.98	18.2	25.9	424.5	7.7	78.6	3.72
1070	2.8	21	323	12.5	40.2	142	12.4	26.8	0.78	1.54	48.3	24.6	1.96	16.1	22.9	368.1	6.8	72.9	3.72
1071	1.3	30.3	333	10.7	48.5	144	9.6	10.3	0.4	1.93	48.1	22	2.19	12.2	17.7	197.7	5.5	70.1	3.93
1072	1.8	28.8	335	10.6	37.9	150	11.4	19.1	1.49	1.01	51.1	24.9	2.05	7.1	10.2	500.5	3.1	76	5.43
1073	2.2	31.6	331	10.8	48.5	159	12.8	26.7	0.84	1.43	49.8	26	1.92	16.9	24.3	468.1	7.4	75.8	4.29
1074	2.2	31.7	330	10.1	50.9	221	13.7	30.2	0.49	1.69	50.1	21.4	2.34	12.2	16.6	321.9	4.4	71.5	3.31
1075	1.7	30.1	334	11.5	47.3	127	11.3	17.5	0.9	1.15	48.4	22.3	2.17	8.5	11.6	291.7	3.1	70.7	4.03
1076	3.7	28.6	328	9.8	33.1	297	10.8	16.2	1.12	0.95	49.8	26.1	1.91	7.1	10.6	374.5	3.5	75.9	5.19
1077	2	30.6	331	11.2	49.7	162	12.7	26.2	2.75	1.11	49.2	24.4	2.02	8.6	12.4	547.1	3.8	73.6	4.37
1078	2.2	28.4	321	10.3	37.9	253	10.4	13.4	1.92	0.89	47.3	27.4	1.73	7.8	11.7	349.7	3.9	74.7	4.24
1079	2.7	30.5	330	11.2	48.5	231	11.2	17	2.6	1.04	47.7	21.8	2.19	12	18.3	379.7	6.3	69.5	5.19
1080	1.8	30.4	337	10.8	50.9	200	10.7	13.8	0.92	0.96	46.4	22.6	2.05	11.8	18.4	460.4	6.6	69	6.16
1081	2.1	31.5	336	10.4	36.7	165	11.4	19.5	0.49	1.55	50	24.2	2.07	11.9	18.6	244	6.7	74.2	2.34
1082	2.6	32.1	343	10.4	48.5	196	10.3	14.5	0.55	1.4	49.5	20.3	2.44	8	10.9	240.2	2.9	69.8	4.77
1083	2.4	33.4	341	10.6	47.3	204	11.4	17.2	1.36	1.2	48.5	23.1	2.1	5.8	8.1	378.1	2.3	71.6	6.75
1084	2.3	32.8	339	10.7	46.2	138	11.2	16.4	4.71	0.66	49.6	20.3	2.44	4.4	6.9	422.7	2.5	69.9	5.51
1085	2.1	30.6	334	11.3	41.4	197	10.2	11.2	0.91	1.25	48.3	20	2.42	9.8	14.9	473.5	5.1	68.3	6.73
1086	2.8	30.8	338	11.3	49.7	153	12.4	24.3	1	1.08	47.1	25.3	1.86	8.1	12	230.3	3.9	72.4	2.53
1087	2.7	30.9	331	11.1	46.2	315	10.9	14.8	2.71	1.13	58.1	25.5	2.28	11.4	16	689.8	4.6	83.6	3.64
1088	1.3	31.9	341	11	48.5	141	11.3	18.2	0.93	1.18	49.1	22.5	2.18	5.4	8.1	288.7	2.7	71.6	3.38
1089	3.2	31.1	325	10.8	47.3	178	11.1	16.5	2.2	1.07	53.1	22.8	2.33	12.1	17.8	421.8	5.7	75.9	3.87
1090	1.5	30	331	11.4	42.6	172	11.1	17.3	3.83	0.65	51.6	22.7	2.27	4.8	7.1	370.6	2.3	74.3	4.19
