# Supplementary material for: Comparison of routine hematological indicators of liver and kidney function, blood count and lipid profile in healthy people and stroke patients
Source: PeerJ. 2020 Feb 7;8:e8545. doi: 10.7717/peerj.8545 (PMC7008814; doi:10.7717/peerj.8545)
Supplement: Supplemental Information 2 [file peerj-08-8545-s002.xlsx]

## Sheet: Sheet1
Sample Number	Lymphocyte (10^9/L)	Mean corpuscular hemoglobin (pg)	Mean corpuscular hemoglobin concentration (g/L)	Red blood cell distribution width-DV (%)	Red blood Cell distribution width-SV (fl)	Platelet (10^9/L)	Mean platelet volume (fl)	Platelet large cell ratio (%)	Triglyceride (mmol/L)	High density lipoprotein cholesterol (mmol/L)	Albumin (g/L)	Globulin (g/L)	Albumin/Globulin (ratio)	Indirect bilirubin (umol/L)	Total bilirubin (umol/L)	Uric acid (umol/L)	Direct bilirubin (umol/L)	Total protein (g/L)	Blood urea nitrogen (mmol/L)
2011	1.52	30.7	336	11.8	39.4	276	9.1	17.4	1.8	1.15	43.5	24.9	1.75	9.8	68.4	209	2.5	68.4	3.3
2012	1.97	28.9	333	12.9	40.9	242	11.7	38.6	0.76	1.25	41	27.1	1.51	22.2	68.1	240	5.3	68.1	4.5
2013	2.18	29	325	12.6	41.4	203	9.6	22.9	1.92	1.28	42.7	31.3	1.36	11.2	74	297	3	74	5.1
2014	1.04	30.5	333	12.4	42.1	274	9.2	18.2	0.53	1.95	39.8	23.3	1.71	11.9	63.1	154	4.1	63.1	5.3
2015	1.34	32.1	341	12.7	42.8	186	10	24.5	1.46	1.08	41.6	29.9	1.39	19.4	71.5	263	5.2	71.5	5
2016	4.23	30.8	341	12.8	41.6	320	9.4	19.4	1.53	1.51	41.5	31.9	1.3	11.8	73.4	288	2.6	73.4	3.9
2017	1.97	31.4	346	12.7	41.5	237	10.9	32.4	6.13	1.22	40.5	29.6	1.37	8	70.1	269	2	70.1	5.7
2018	2.52	31.2	348	12	39.4	230	11.1	33.5	1.35	1	41	25.6	1.6	12.1	66.6	335	3.9	66.6	6
2019	1.34	28.6	324	13.3	43.1	231	10.3	26.8	2.08	1.13	39.5	25.3	1.56	7.9	64.8	251	2.3	64.8	5.6
2020	2.25	30.5	346	12.3	39.9	321	9.9	24.5	0.71	1.17	43.5	31.4	1.39	16.6	74.9	172	5.5	74.9	5.2
2021	2.68	31.4	353	12.2	39.5	226	9.6	21.3	4.82	0.65	42.1	24.1	1.75	9.8	66.2	220	3.2	66.2	5.3
2022	1.91	63.1	333	12.5	41.5	251	8.7	14.2	0.98	1.61	45.5	29.1	1.56	8.6	74.6	328	2.9	74.6	5.2
2023	2.36	30.4	353	11.9	37.7	233	10.7	30.8	2.48	0.93	44	23.7	1.86	15	67.7	253	5.5	67.7	6.8
2024	1.11	31.4	332	14.6	49.5	232	10.5	28.7	0.89	1.42	42.8	23.3	1.84	11.2	66.1	150	4.8	66.1	8.3
2025	1.65	32.5	357	11.8	39.1	169	10.7	31	0.8	1.34	44	23.4	1.88	35	67.4	340	10	67.4	3.8
2026	0.8	33.9	358	12.9	44.9	117	10.8	31.3	0.51	1.04	38.7	19.8	1.95	13.1	58.5	293	5.3	58.5	6
2027	3.54	31.3	336	13.2	45.1	318	10.4	28.3	2.45	0.87	40.9	24.2	1.69	7.8	65.1	249	2.4	65.1	4.6
2028	2.24	33.6	329	12.4	46.7	190	10.5	28.3	1.39	0.41	39.8	23.5	1.69	8.9	63.3	187	3.2	63.3	5
2029	1.06	32.4	348	12.4	40.8	178	10	24.9	1.17	1.46	42.1	24.6	1.71	23.9	66.7	312	7.1	66.7	7
2030	2.01	31.2	335	12.8	43.7	267	10.5	29.2	1.55	0.83	40.5	19.5	2.08	6.2	60	292	2	60	6.4
2031	2.93	30.9	341	12.3	40.7	161	11.3	35.2	2.65	1.03	42.5	23.8	1.79	11	66.3	227	3.1	66.3	5.2
2032	2.22	34.3	357	11.6	40	219	9.3	18.8	1.62	0.91	38.1	29.4	1.3	10.5	67.5	5	3.2	67.5	4.9
2033	1.18	29.1	323	12.6	41.6	151	11.3	35.5	0.73	1.25	37.5	20.6	1.82	25.2	58.1	235	7.5	58.1	5.9
2034	2.1	31.3	343	12.2	40.4	206	10.9	32.8	3.21	0.78	43.3	26.4	1.64	26.6	69.7	369	7.1	69.7	5.3
2035	1.61	30.2	345	12.3	39.7	174	12	41.1	1.34	1.1	42.9	23.3	1.84	15	66.2	239	6	66.2	5
2036	1.11	29.5	349	13.1	40.4	264	10.3	26.5	1.14	0.99	42.4	27.1	1.56	14.8	69.5	450	6.3	69.5	5.2
2037	2.1	29.2	337	13.3	41.5	258	10	24.2	0.86	1.06	41.4	31.9	1.3	7.7	73.3	276	2.8	73.3	5.5
2038	1.14	30.6	333	12.3	41.4	173	10.4	27.4	2.09	0.62	42.7	30.6	1.4	9.3	73.3	268	3.2	73.3	4.7
2039	1.28	33.1	349	12.8	44.8	174	10.6	28.9	0.92	1.09	39.4	21	1.88	18.5	60.4	286	6.5	60.4	6.6
2040	1.45	31.3	357	11.4	36.8	358	9.4	19.7	0.68	1.37	46.2	25.2	1.83	10.1	71.4	157	3	71.4	6.7
2041	2.69	33.2	333	12.1	44.4	357	8.8	14.6	1.73	1.05	40.6	24.7	1.64	7.4	65.3	319	2.8	65.3	11.2
2042	1.37	31.8	342	12.1	41.5	185	9	17.4	2	0.8	42.8	29.8	1.44	9.5	72.6	363	2.8	72.6	4.4
2043	1.59	29.5	325	13.8	46.1	196	9.9	24.1	1.46	1.22	37.6	23.5	1.6	10	61.1	431	3	61.1	6.7
2044	2.25	30.7	336	13.2	45.1	262	10.3	26.7	1.1	0.9	40	19.8	2.02	16.6	59.8	340	4.6	59.8	6.4
2045	2.11	29	326	12.5	41.1	234	10.6	29.9	6.25	1.11	41.5	30.6	1.36	6.9	72.1	335	1.6	72.1	5.2
2046	2.1	27.1	335	14.3	41.2	300	8.8	14.8	4.59	0.88	21.5	21.8	0.99	5.3	43.3	204	2.1	43.3	5.7
2047	2.03	32.7	337	12.2	43.6	208	10.8	31.7	1.12	1.45	41	21	1.95	7	67	378	3.2	67	3.8
2048	2.18	30.8	330	12.1	42	214	10.2	26.4	0.93	1.07	43	25.4	1.72	5.9	73	412	2.9	73	4.7
2049	2.1	29.1	336	12.5	39.8	230	11.3	36.1	0.74	1.63	48	24.3	1.96	4.6	69	298	4.1	69	3.4
2050	0.99	30.8	335	11.9	40.2	111	11.6	37.2	1.33	0.99	39	26	1.5	3.5	75	355	2.7	75	4.5
2051	2.21	29.8	333	12.3	40	200	11.5	37.3	1.09	1.21	47	22.7	2.07	12	81	378	3.8	81	5.1
